# Supplementary material
Source: PubMed Central journal article supplement (PMC10674028)

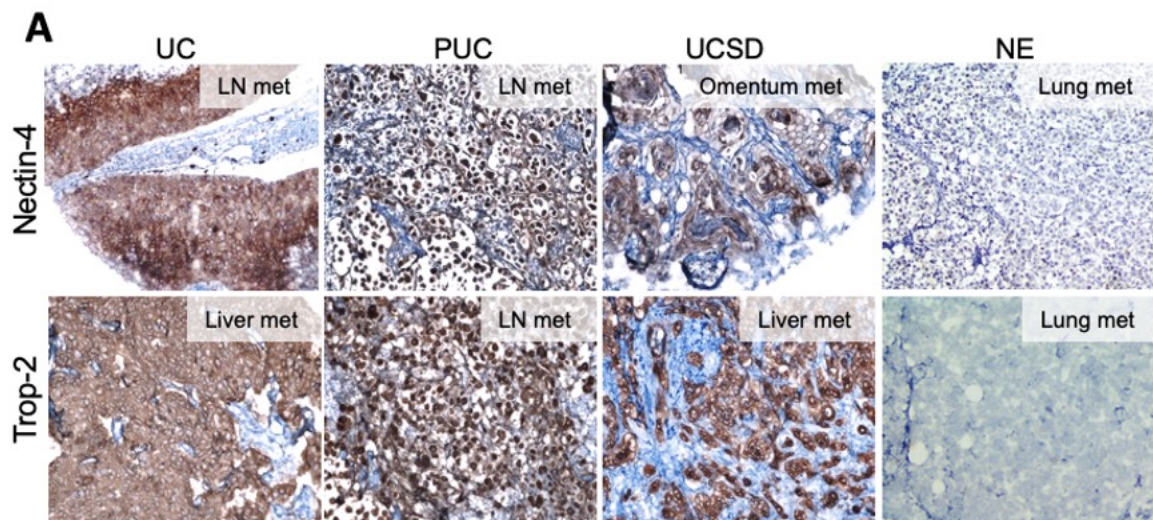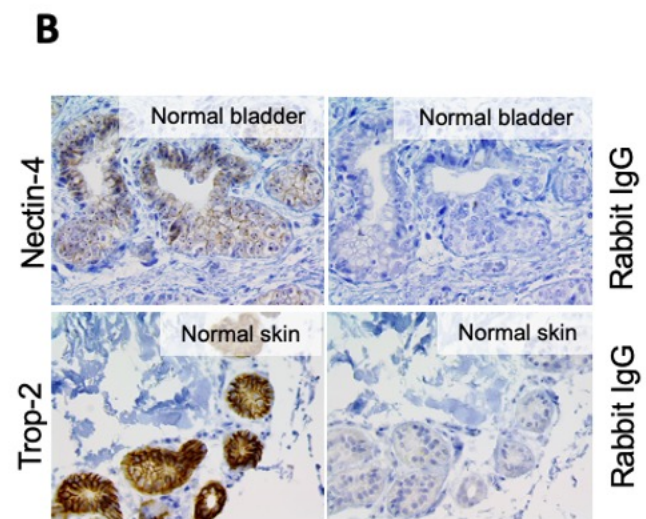

Supplement: NIHMS1940620-supplement-Supp_Fig_1.pdf [file NIHMS1940620-supplement-Supp_Fig_1.pdf]

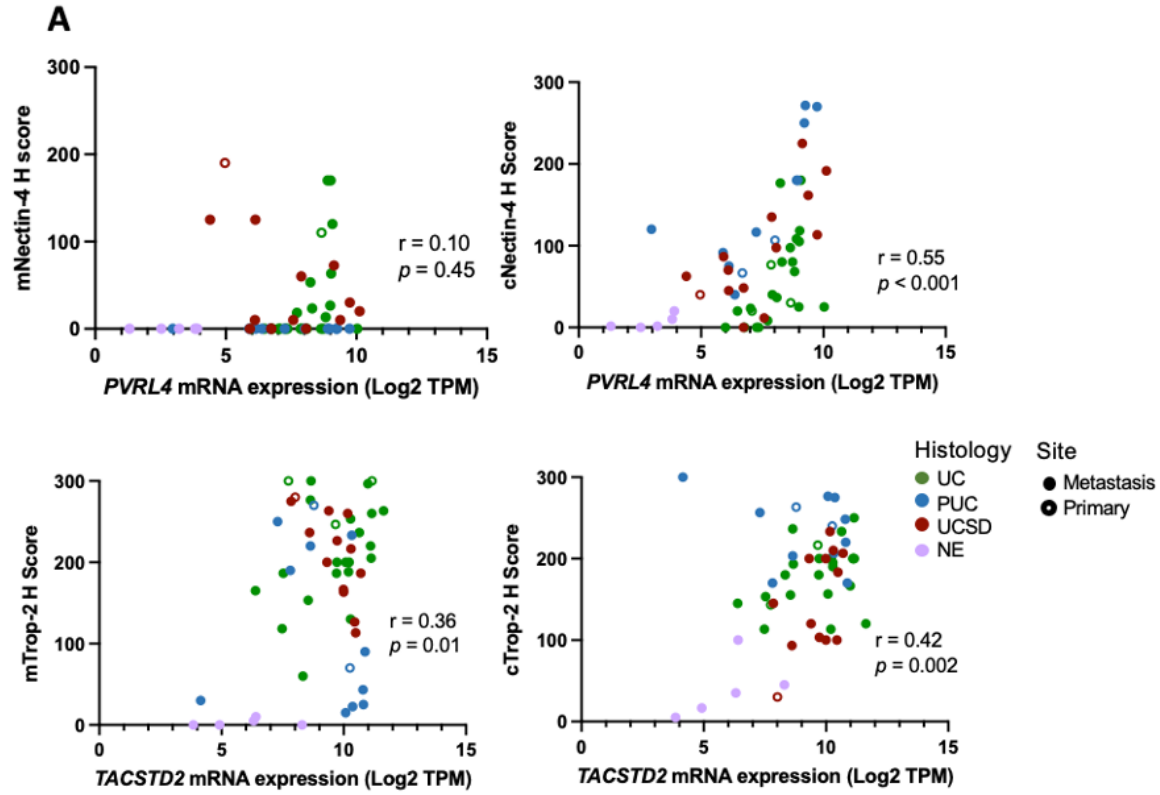

**B**

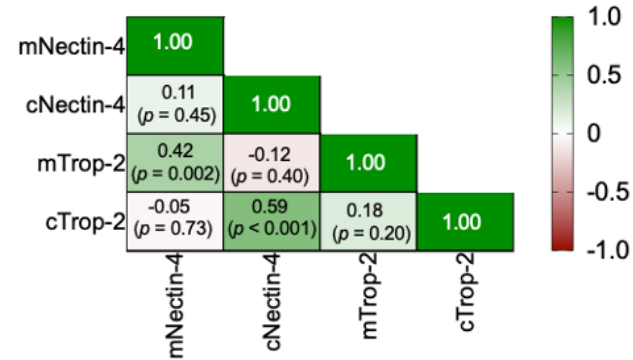

Supplement: NIHMS1940620-supplement-Supp_Fig_2.pdf [file NIHMS1940620-supplement-Supp_Fig_2.pdf]

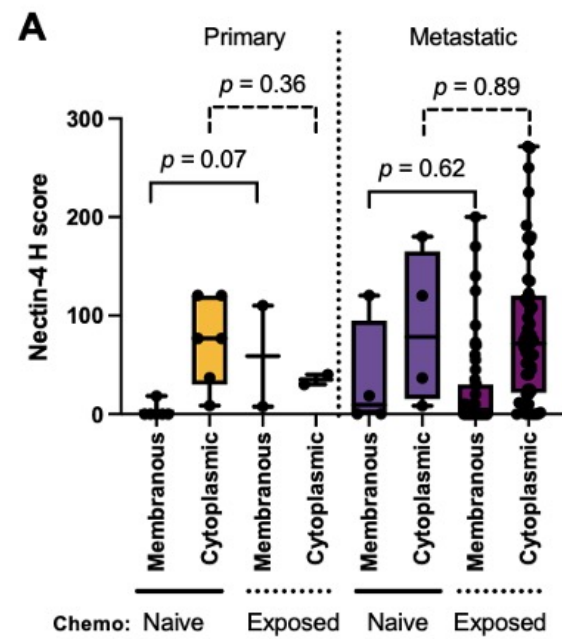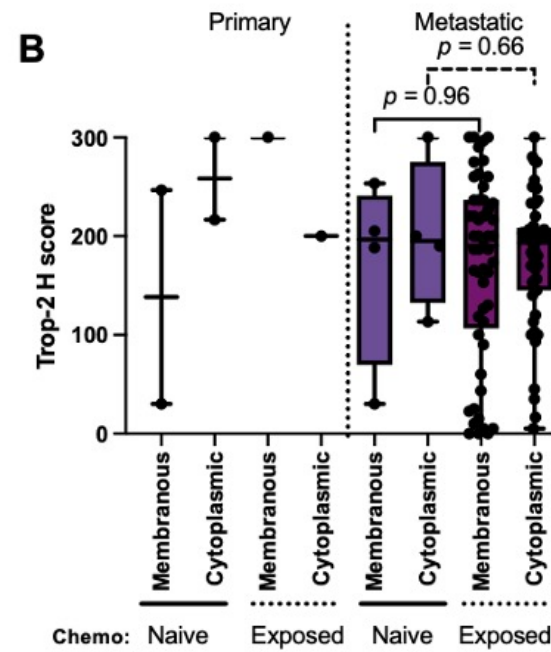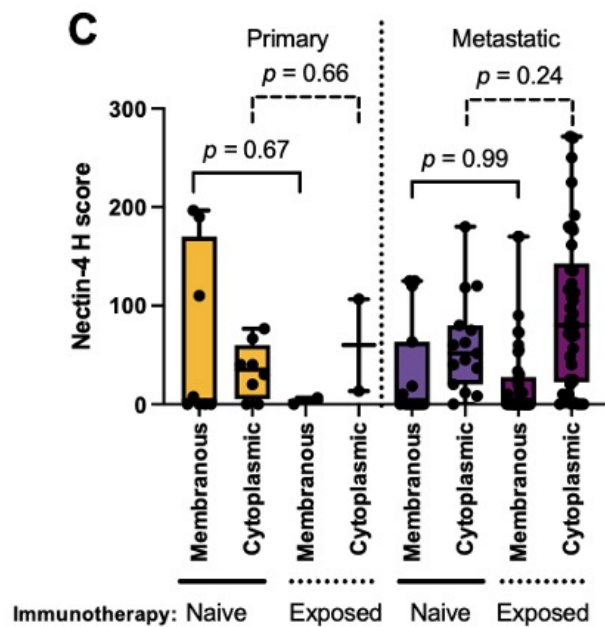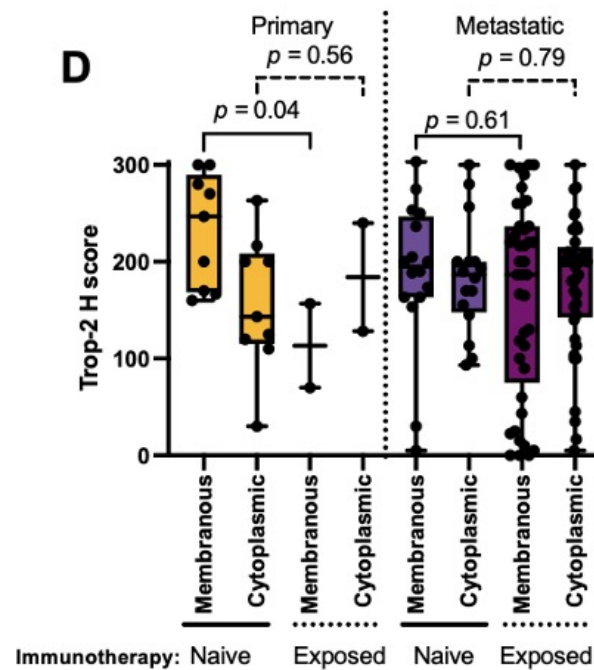

Supplement: NIHMS1940620-supplement-Supp_Fig_3.pdf [file NIHMS1940620-supplement-Supp_Fig_3.pdf]
